# Supplementary material for: Role of distal arginine residue in the mechanism of heme nitrite reductases
Source: Royal Society of Chemistry journal article supplement (doi:10.1039/d3sc01777j), 2023-01-01
Supplement: d3sc01777j1.pdf [file d3sc01777j1.pdf]

## Supporting information

# Role of Distal Arginine Residue in the Mechanism of heme Nitrite Reductases

Ankita Sarkar, Snehadri Bhakta, Samir Chattopadhyay, Abhishek Dey\*

School of Chemical Sciences, Indian Association for the Cultivation of Science, 2A Raja SC  
Mullick Road, Kolkata, WB, India, 700032.

Email: abbeyde@gmail.com

### Table of Content

|                                                                                                                                                                                                                                                                         |   |
|-------------------------------------------------------------------------------------------------------------------------------------------------------------------------------------------------------------------------------------------------------------------------|---|
| 1. Materials and Methods.....                                                                                                                                                                                                                                           | 3 |
| 2. Instrumentation.....                                                                                                                                                                                                                                                 | 3 |
| 3. Synthesis of [Fe <sup>III</sup> MARGH]Cl <sub>2</sub> and Fe <sup>III</sup> TPPCL.....                                                                                                                                                                               | 3 |
| 4. Preparation of 2,6-xylidinium chloride salt .....                                                                                                                                                                                                                    | 3 |
| 5. Preparation of 2,6-xylidinium <i>p</i> -toluene sulfonate salt.....                                                                                                                                                                                                  | 3 |
| 6. Preparation of NO complexes.....                                                                                                                                                                                                                                     | 4 |
| 7. DFT calculation procedure.....                                                                                                                                                                                                                                       | 4 |
| 8. FTIR dat of {FeNO} <sup>7</sup> complex of [Fe <sup>II</sup> MARGH]Cl .....                                                                                                                                                                                          | 4 |
| 9. FTIR data of deprotonation of the pendant guanidinium arm of [Fe <sup>II</sup> MARGH]Cl during the formation of its {FeNO} <sup>7</sup> complex .....                                                                                                                | 5 |
| 10. The absorption and X-band EPR data of the reaction of FeTPP with [NBu <sub>4</sub> ]NO <sub>2</sub> in the absence and in the presence of external proton source.....                                                                                               | 6 |
| 11. Kinetic trace at 540 nm regarding the formation of {FeNO} <sup>7</sup> complex of [MARGH]Cl in the presence of 5 equivalent 2,6-xylidinium chloride along with 5 equivalent [NBu <sub>4</sub> ]NO <sub>2</sub> and the corresponding simulation of the traces ..... | 7 |
| 12. Absorption and X-band EPR data of the mixture of [Fe <sup>II</sup> MARGH]Cl, nitrite and external proton incubated with Co <sup>II</sup> TPP.....                                                                                                                   | 8 |
| 13. Traces at 540 nm regarding the H/D KIE on the formation of {FeNO} <sup>7</sup> complex of [MARGH]Cl.....                                                                                                                                                            | 9 |
| 14. Kinetic traces at 692 nm regarding the reaction of [Fe <sup>II</sup> MARGH]Cl with different equivalent of [NBu <sub>4</sub> ]NO <sub>2</sub> in the presence of 20 equivalent 2,6-xylidinium chloride and the corresponding simulations of the traces .....        | 9 |
| 15. Traces at 692 nm regarding the H/D KIE on the reaction of [Fe <sup>II</sup> MARGH]Cl with 20 equivalent [NBu <sub>4</sub> ]NO <sub>2</sub> in the presence of 20 equivalent 2,6-xylidinium chloride and deuterated 2,6-xylidinium chloride .....                    | 9 |

|                                                                                                                                                                                                                                                                   |       |
|-------------------------------------------------------------------------------------------------------------------------------------------------------------------------------------------------------------------------------------------------------------------|-------|
| 16. The absorption spectrum of [Fe <sup>II</sup> MARGH]Cl upon addition of 2,6-xylidinium <i>p</i> -toluene sulfonate simultaneously with nitrite and the corresponding kinetic trace followed at 692 nm regarding the formation of resultant ferric species..... | 10    |
| 17. Absorption spectra of the reaction of Fe <sup>II</sup> TPP with 5 equivalent [NBu <sub>4</sub> ]NO <sub>2</sub> in the presence of 20 equivalent 2,6-xylidinium chloride .....                                                                                | 10    |
| 18. Normalized EPR intensities of the axial and rhombic signals of {FeNO} <sup>7</sup> complex of [MARGH]Cl with time.....                                                                                                                                        | 11    |
| 19. X-band EPR data of the formation of {FeNO} <sup>6</sup> complex of [MARGH]Cl and its reaction with 20 equivalent 2,6-xylidinium chloride .....                                                                                                                | 11    |
| 20. Coordinates of the optimised geometries.....                                                                                                                                                                                                                  | 11-23 |
| 21. References.....                                                                                                                                                                                                                                               | 23    |

## 1. Materials and Methods

All reagents used are of the highest grade commercially available products. Hydrochloric acid, sulfuric acid and spectroscopic grade THF, methanol are purchased from Merck. Sodium sulphide ( $\text{Na}_2\text{S}$ ,  $9\text{H}_2\text{O}$ ), sodium nitrite, anhydrous tetra-butyl ammonium nitrite, 2,6-xylydine, potassium hydroxide are purchased from Sigma-Aldrich chemical company.

## 2. Instrumentation

The anaerobic cuvettes are purchased from Starna Scientific. The Fourier transform infrared (FTIR) data are measured on a Shimadzu FTIR 8400S instrument. The  $\text{CaF}_2$  windows for FTIR spectroscopy are purchased from Sigma-Aldrich. The anaerobic setup for FTIR spectroscopy is purchased from PerkinElmer. All the EPR spectra are recorded on a X-band JEOL (JES FA200) instrument. Head-space gas is detected in GC instrument of model no. 7890B (G3440B), serial no. CN14333203 fitted with TCD. The porphyrins, tetra-butyl ammonium nitrite and 2,6-xylydinium chloride are dissolved in dry, deaerated THF to carry all these experiments.

### UV-Vis Data Collection

All anaerobic absorption data are collected by taking the samples in tightly sealed anaerobic cuvettes at RT. The samples are prepared in a glove box under the pressure of Ar. The solvent background is corrected prior to the experiments with an identical amount of solvent mixture. Ferric porphyrins are reduced by 1 electron with required equivalent of  $\text{Na}_2\text{S}$  solution (half equivalent reductant for 1 equivalent ferric porphyrin). For H/D KIE experiments, we incubated  $[\text{Fe}^{\text{III}}\text{MARGH}]\text{Cl}_2$  complex with methanol- $\text{d}_4$  for overnight and then reduced it with required  $\text{Na}_2\text{S}$  also dissolved in methanol- $\text{d}_4$ . To prepare the deuterated 2,6-xylydinium chloride solution the salt was also incubated with for methanol- $\text{d}_4$  overnight.

### FTIR Data Collection

The  $\text{CaF}_2$  windows are fitted in an anaerobic setup and sample solution is taken into it. The samples are prepared in a glove box under the pressure of Ar. Ferric porphyrins are reduced by 1 electron with required equivalent of  $\text{Na}_2\text{S}$  solution (half equivalent reductant for 1 equivalent ferric porphyrin).

### X-band EPR Data

The samples (150  $\mu\text{L}$ ) are taken in EPR tubes and thoroughly sealed inside the glovebox under the pressure of Ar, brought from the box and frozen in liquid  $\text{N}_2$ . All the data are collected at 77 K. Ferric porphyrins are reduced by 1 electron with required equivalent of  $\text{Na}_2\text{S}$  solution (half equivalent reductant for 1 equivalent ferric porphyrin).

### GC-TCD Data

400  $\mu\text{L}$  head-space gas is syringe out by a gas tight syringe and injected into the inlet of the GC (fitted with TCD). The  $\text{N}_2\text{O}$  gas is detected in GC-TCD.

## 3. Synthesis of $[\text{Fe}^{\text{III}}\text{MARGH}]\text{Cl}_2$

The molecule is synthesised using the protocol reported in the reference 1.<sup>1</sup> Elemental analysis of  $\text{C}_{45}\text{H}_{32}\text{N}_7\text{Cl}_2\text{Fe}$  is calculated(%) to be: C 67.77, H 4.04, N 12.29 and found to be: C 67.50, H 4.10, N 12.20.

## 4. Synthesis of $\text{Fe}^{\text{III}}\text{TPPCI}$

The molecule is synthesised using the protocol of Alder et al.<sup>2-3</sup>

## 5. Preparation of 2,6-xylidinium chloride salt and 2,6-xylidinium *p*-toluene sulfonate salt

2,6-xylidine is dissolved in THF and 6N hydrochloric acid is added to it dropwise till white solids appear. Then the solid is dried under high vacuum to make it anhydrous powder and kept in glove box. The aliquot of 2,6-xylidinium chloride is made by dissolving required amount of the salt in dry, deaerated THF in glove box. 2,6-xylidinium *p*-toluene sulfonate salt is prepared with the same protocol.

## 6. Preparation of NO complexes

Dry, degassed NO is generated upon dropwise addition of a deaerated, saturated solution of sodium nitrite to a deaerated 3N sulfuric acid solution. The gas is passed through bubblers containing 4N KOH solution, followed by a bubbler containing concentrated sulfuric acid. The gas is purged through the samples as well as dry, deaerated THF solution taken in properly sealed, septa-attached anaerobic vials over a period of 10 minutes.

## 7. DFT Calculation

Density functional theory (DFT) optimized structures are obtained for the hypothetical models of high spin  $[\text{Fe}^{\text{III}}\text{MARGH}]\text{-NO}_2^-$ ,  $\text{Fe}^{\text{III}}\text{TPP-NO}_2^-$ ,  $[\text{Fe}^{\text{III}}\text{MARGH}]\text{-Cl}$ ,  $\text{Fe}^{\text{III}}\text{TPP-Cl}$ , low spin  $\{\text{Fe}(\text{MARGH})\text{NO}\}^6$  complex of and  $\{\text{Fe}(\text{TPP})\text{NO}\}^6$  complex. The geometries are optimized using unrestricted BP86 functional with gradient correction with the help of the Gaussian 16 version (g16) in the gas phase. (Ref: <https://gaussian.com/citation/>). The 6-311G(d) basis set is used for the optimization of all of the atoms.<sup>4</sup> Frequency calculations are performed on the optimized geometry to confirm that the minimum energy is obtained and the absence of any imaginary modes in these models. All of the atoms are optimised using the 6-311+G(d) basis set in a polarizable continuum model with THF to determine the final energy of the models and the frequency convergence criterion of  $10^{-10}$  Hartree.<sup>5-7</sup> The Gibbs free energies are calculated from the final optimized geometries and frequencies. The electrostatic potential plot in *figure 10* distributions was made using the cubegen utility of the GaussView 6 software (<https://gaussian.com/citation/>) with an isovalue of 0.0004.

## 8. Spectroscopic data

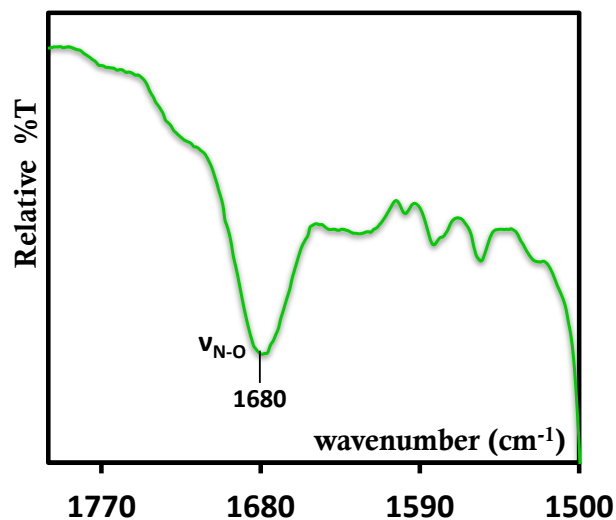

**Figure S1.** FTIR spectra of  $\{\text{FeNO}\}^7$  complex generated in the reaction of  $[\text{Fe}^{\text{II}}\text{MARGH}]\text{Cl}$  with  $[\text{NBu}_4]\text{NO}_2$ .

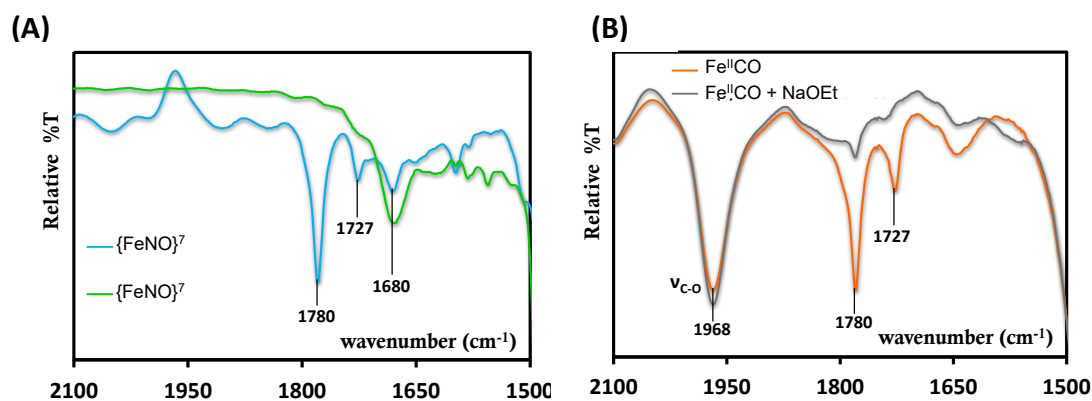

**Figure S2. (A)** FTIR spectra of pure  $\{\text{FeNO}\}^7$  complex generated with the addition of  $\text{Ph}_3\text{CSNO}$  to the  $[\text{Fe}^{\text{III}}\text{MARGH}]\text{Cl}_2$  solution (cyan) and the  $\{\text{FeNO}\}^7$  complex generated with addition of  $[\text{NBu}_4]\text{NO}_2$  to  $[\text{Fe}^{\text{II}}\text{MARGH}]\text{Cl}$  (green). **(B)** FTIR spectra of pure  $\text{Fe}^{\text{II}}\text{CO}$  complex of  $[\text{MARGH}]\text{Cl}$  (orange) and the product generated after incubation of the complex with  $\text{NaOEt}$  for an hour (grey).

The FTIR spectrum of the pure  $\{\text{FeNO}\}^7$  species generated from the reaction of  $[\text{Fe}^{\text{III}}\text{MARGH}]\text{Cl}_2$  and  $\text{Ph}_3\text{CSNO}$  shows  $\nu_{N-O}$  at  $1680\text{ cm}^{-1}$  and characteristic vibrations of the protonated guanidinium arm at

1727  $\text{cm}^{-1}$  and 1780  $\text{cm}^{-1}$  (Figure S2A, cyan). However, the FTIR spectra of the  $\{\text{FeNO}\}^7$  species generated in the reaction of the reduced porphyrin,  $[\text{Fe}^{\text{II}}\text{MARGH}]\text{Cl}$  with  $[\text{NBu}_4]\text{NO}_2$  clearly indicates that the protons of the pendant guanidinium arm of the complex are consumed during the reaction as no corresponding vibrations are observed (Figure S2A, green).  $[\text{Fe}^{\text{III}}\text{MARGH}]\text{Cl}_2$  is reduced to the ferrous porphyrin and dry CO gas is bubbled into the aprotic solution of the reduced iron-porphyrin. The  $\nu_{\text{C-O}}$  of this CO bound complex of the ferrous porphyrin is 1968  $\text{cm}^{-1}$  whereas FTIR vibrations at 1727  $\text{cm}^{-1}$  and 1780  $\text{cm}^{-1}$  indicate that the guanidinium arm of the complex is protonated even after the reduction of ferric to ferrous porphyrin (Figure S2B, orange). When the CO bound complex of the ferrous porphyrin is incubated with dry NaOEt solution for at least 1 hour the characteristic vibrations of the protonated guanidinium arm are found to be diminished keeping the  $\nu_{\text{C-O}}$  almost unperturbed (Figure S2B, grey). It indicates that NaOEt results in the deprotonation of the pendant guanidinium group of the complex. These results suggest that the reduction of  $[\text{Fe}^{\text{III}}\text{MARGH}]\text{Cl}_2$  results into  $[\text{Fe}^{\text{II}}\text{MARGH}]\text{Cl}$  where the pendant guanidine is protonated as the ferric porphyrin.

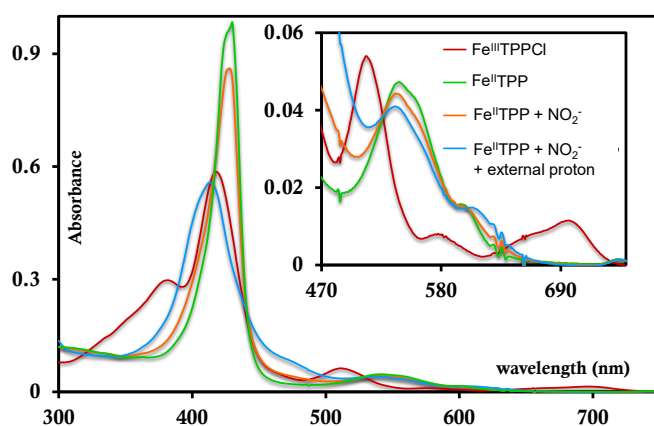

**Figure S3.** Absorption spectra of  $\text{Fe}^{\text{III}}\text{TPPCI}$  (dark red),  $\text{Fe}^{\text{II}}\text{TPP}$  (green) and the spectra of  $\text{Fe}^{\text{II}}\text{TPP}$  upon addition of  $[\text{NBu}_4]\text{NO}_2$  (orange) followed by the addition of 2,6-xyliidinium chloride as external proton source (sky blue).

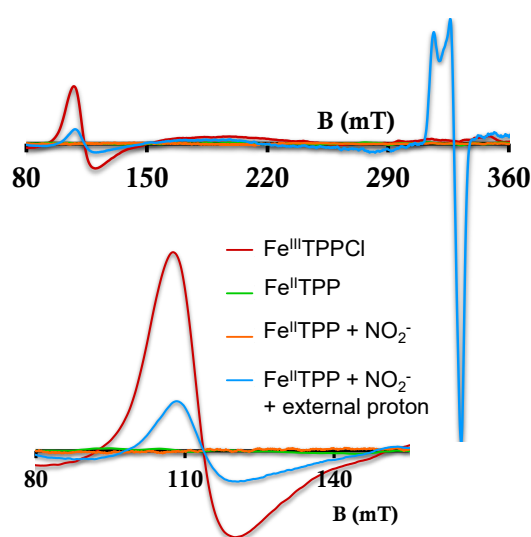

**Figure S4.** X-band EPR spectra of  $\text{Fe}^{\text{III}}\text{TPPCI}$  (dark red),  $\text{Fe}^{\text{II}}\text{TPP}$  (green) and the spectra of  $\text{Fe}^{\text{II}}\text{TPP}$  upon addition of  $[\text{NBu}_4]\text{NO}_2$  (orange) followed by the addition of 2,6-xyliidinium chloride as external proton source (sky blue).

Figure S3 and S4 suggest that the  $\text{Fe}^{\text{II}}\text{TPPCl}$  complex produces  $\{\text{FeNO}\}^7$  species with  $[\text{NBu}_4]\text{NO}_2$  only in presence of 2,6-xylylidinium chloride (external source of protons) which produces the required protons in the solution to cleave the N-O bond of the  $\text{NO}_2^-$  bound to the ferrous centre.

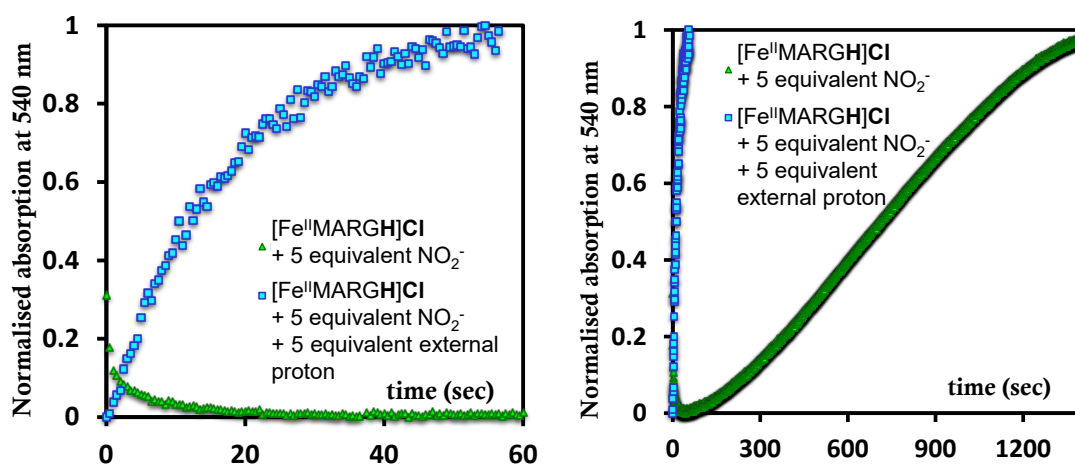

**Figure S5.** The corresponding kinetic trace followed at 540 nm regarding the formation of  $\{\text{FeNO}\}^7$  complex upon addition of 5 equivalent  $[\text{NBu}_4]\text{NO}_2$  to  $[\text{Fe}^{\text{II}}\text{MARGH}]\text{Cl}$  (green) and also the formation of the same complex upon simultaneous addition of 5 equivalent  $[\text{NBu}_4]\text{NO}_2$  and 5 equivalent 2,6-xylylidinium chloride (source of external proton) to  $[\text{Fe}^{\text{II}}\text{MARGH}]\text{Cl}$  (blue).

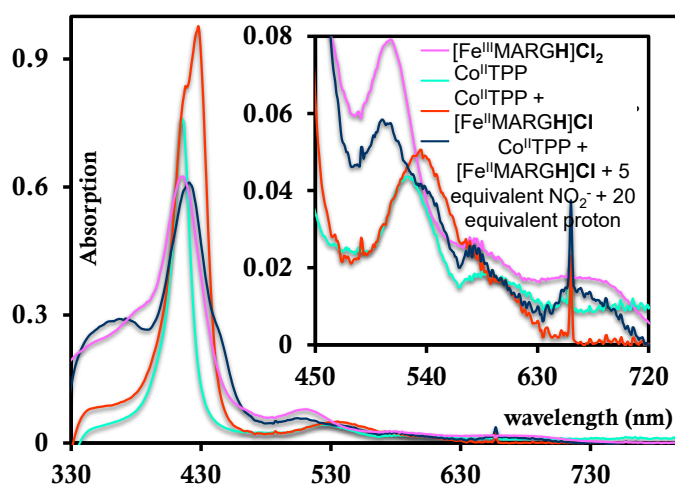

**Figure S6.** Absorption spectra of  $\text{Co}(\text{II})\text{TPP}$  (sky blue), mixture of  $\text{Co}(\text{II})\text{TPP}$  and  $[\text{Fe}^{\text{II}}\text{MARGH}]\text{Cl}$  (red) and that of the reaction of  $[\text{Fe}^{\text{II}}\text{MARGH}]\text{Cl}$  upon addition of 20 equivalent 2,6-xylylidinium chloride (source of external protons) simultaneously with 5 equivalent  $[\text{NBu}_4]\text{NO}_2$  and incubated with  $\text{Co}(\text{II})\text{TPP}$  (dark blue).

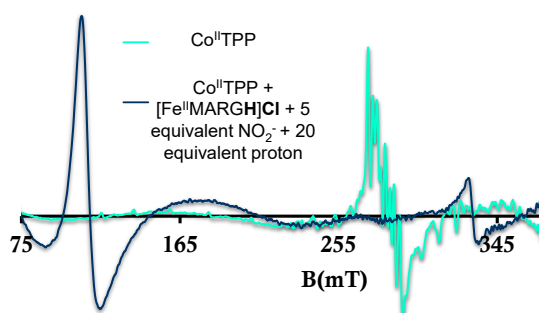

**Figure S7.** X-band EPR spectra of Co<sup>II</sup>TPP (sky blue) and that of the reaction of [Fe<sup>II</sup>MARGH]Cl upon addition of 20 equivalent 2,6-xylydinium chloride (source of external protons) simultaneously with 5 equivalent [NBu<sub>4</sub>]NO<sub>2</sub> and incubated with Co<sup>II</sup>TPP (dark Blue).

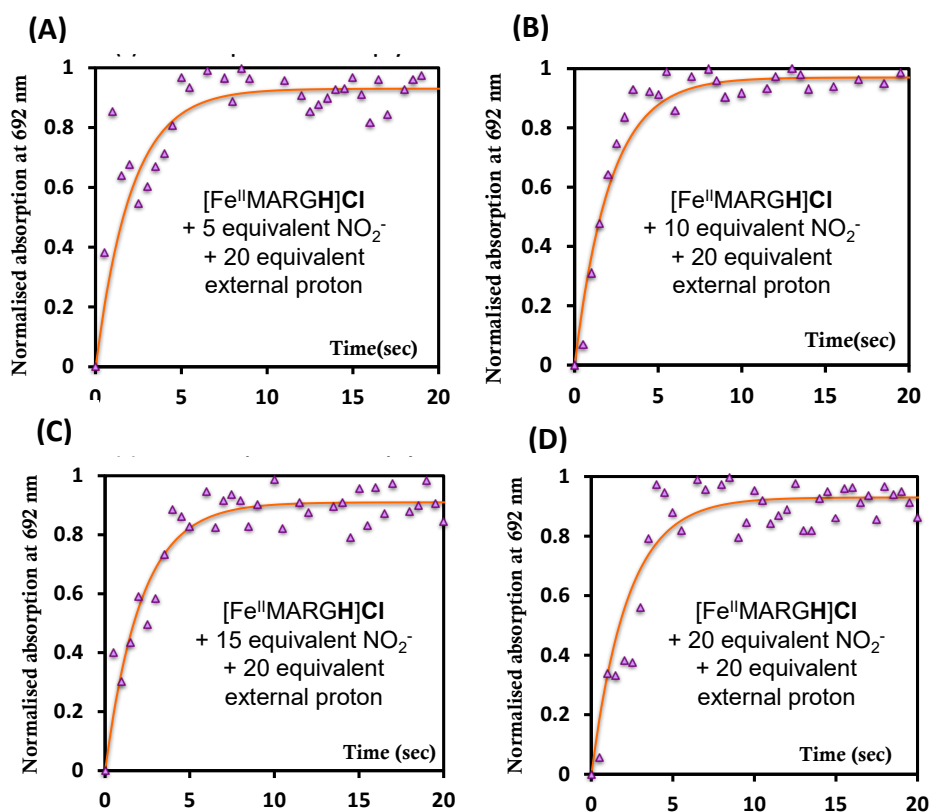

**Figure S8.** Kinetic trace followed at 692 nm regarding the formation of Fe<sup>III</sup>-Cl species upon simultaneous addition of 5, 10, 15 and 20 equivalents [NBu<sub>4</sub>]NO<sub>2</sub> and 20 equivalent 2,6-xylydinium chloride to the [Fe<sup>II</sup>MARGH]Cl, (A), (B), (C), (D), respectively.



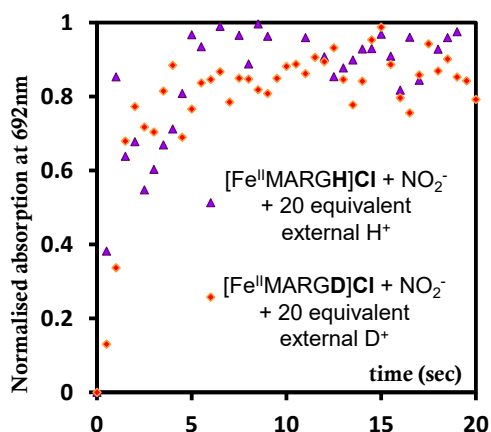

**Figure S9.** Kinetic trace followed at 692 nm regarding the formation of Fe<sup>III</sup>-Cl species upon simultaneous addition of 20 equivalents [NBu<sub>4</sub>]NO<sub>2</sub> and 20 equivalent 2,6-XylidiniumH chloride (as the external H<sup>+</sup> source) to [Fe<sup>II</sup>MARGH]Cl complex (violet) and 20 equivalents [NBu<sub>4</sub>]NO<sub>2</sub> and 20 equivalent 2,6-XylidiniumD chloride (as the external D<sup>+</sup> source) to [Fe<sup>II</sup>MARGD]Cl complex (red).

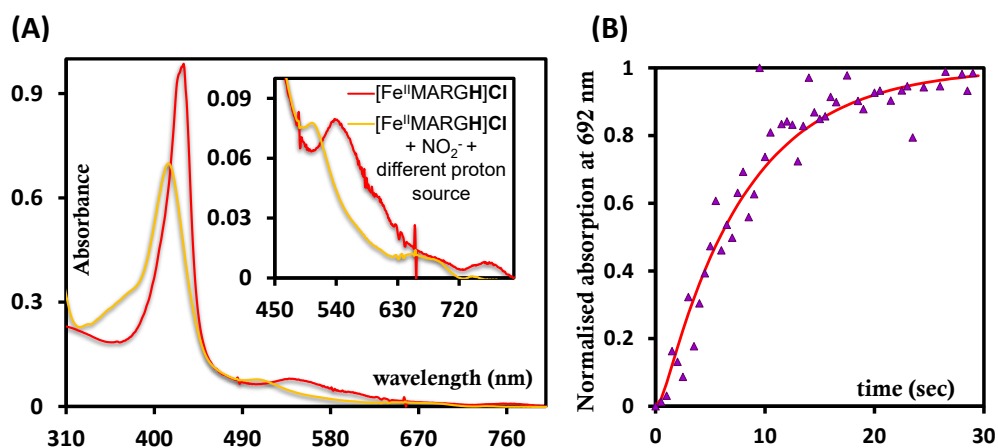

**Figure S10.** (A) The absorption spectrum of [Fe<sup>II</sup>MARGH]Cl upon addition of 2,6-xylidinium *p*-toluene sulfonate simultaneously with nitrite (yellow) and (B) the corresponding kinetic trace followed at 692 nm regarding the formation of resultant ferric porphyrin species. The pseudo 1<sup>st</sup> order rate obtained from the data is 0.27 s<sup>-1</sup>.

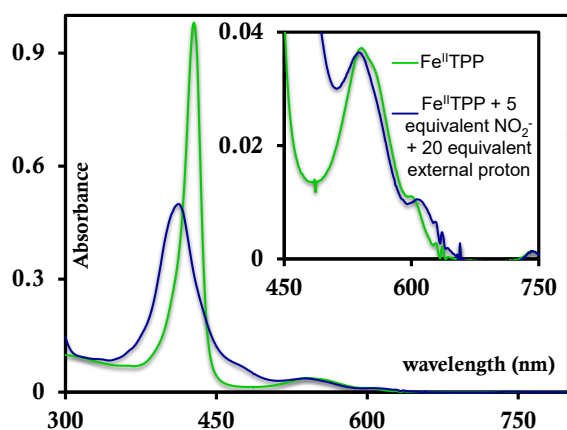

**Figure S11.** Absorption spectra of Fe<sup>II</sup>TPP (green), the product upon simultaneous addition of 5 equivalents [NBu<sub>4</sub>]NO<sub>2</sub> and 20 equivalent 2,6-xylidinium chloride to Fe<sup>II</sup>TPP (blue).

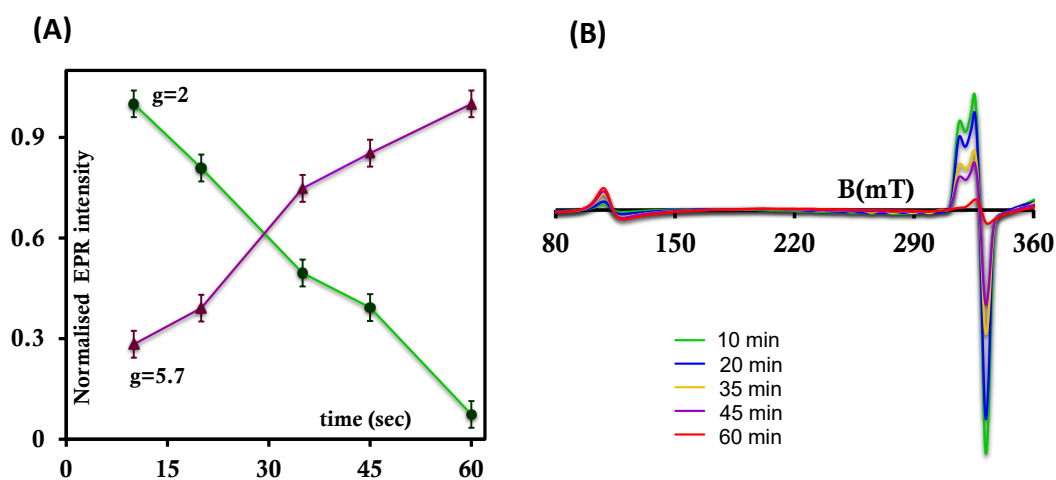

**Figure S12. (A)** Plot of normalized EPR intensities of the axial (violet) and rhombic (green) signals of {FeNO}<sup>7</sup> complex of [MARGH]Cl with time. **(B)** The corresponding X-band EPR data.

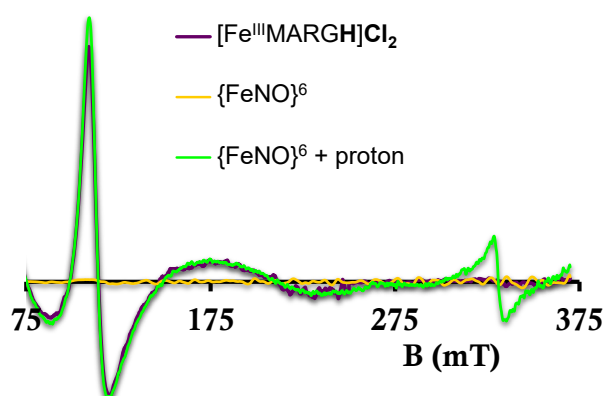

**Figure S13.** X-band EPR spectra of  $[\text{Fe}^{\text{III}}\text{MARGH}]\text{Cl}_2$  (violet), in-situ formed  $\{\text{FeNO}\}^6$  complex of it (yellow) and  $\text{Fe}^{\text{III}}\text{-Cl}$  species upon addition of 2,6-xylydinium chloride (as a source of external proton) to that  $\{\text{FeNO}\}^6$  complex of  $[\text{MARGH}]\text{Cl}$  (green).

## 11. Coordinates obtained from DFT optimizations

### 11.1. $\{\text{Fe}(\text{MARGH})\text{NO}\}^6$ complex:

Charge: +2, spin multiplicity: 1

|    |            |             |            |
|----|------------|-------------|------------|
| Fe | 3.58205200 | 8.83876900  | 6.52740400 |
| N  | 5.33200300 | 9.37420800  | 5.78887700 |
| N  | 2.79107100 | 9.08306600  | 4.71503300 |
| N  | 1.76255800 | 9.09757500  | 7.28425300 |
| N  | 4.33386700 | 9.15454600  | 8.34281300 |
| C  | 6.75501800 | 9.05702700  | 7.81788300 |
| C  | 4.80276400 | 9.63702000  | 3.36402100 |
| C  | 3.47324600 | 9.19490500  | 3.50831400 |
| C  | 1.49174500 | 8.69675800  | 4.34998700 |
| C  | 7.03430200 | 10.14637200 | 4.38941700 |
| C  | 7.59744400 | 9.90274000  | 5.61334900 |
| C  | 6.55136300 | 9.40256200  | 6.46733300 |
| C  | 5.65383200 | 9.74549700  | 4.47391300 |
| C  | 1.40293400 | 8.49754900  | 2.92570600 |
| C  | 2.62545700 | 8.82612600  | 2.40221200 |

|   |             |             |             |
|---|-------------|-------------|-------------|
| C | 2.26921400  | 9.38432500  | 9.71328400  |
| C | 3.64581200  | 9.15058900  | 9.55713800  |
| C | 1.39755100  | 9.36842600  | 8.60934800  |
| C | 0.40427700  | 8.68048700  | 5.23096000  |
| C | 4.53972200  | 8.86943500  | 10.65130100 |
| C | 5.66757700  | 8.92023000  | 8.69656100  |
| C | 5.78728600  | 8.69150500  | 10.11369600 |
| C | -0.55668100 | 9.27009600  | 7.47509000  |
| C | -0.02690500 | 9.53643400  | 8.71421000  |
| C | 0.55039400  | 8.98605900  | 6.59787700  |
| H | 7.50617300  | 10.56074100 | 3.50042500  |
| H | 8.62197100  | 10.08466500 | 5.93342000  |
| H | 0.51175700  | 8.17606100  | 2.38870400  |
| H | 2.93804300  | 8.81993300  | 1.35915900  |
| H | 4.23787500  | 8.79644500  | 11.69496500 |
| H | 6.71400700  | 8.44600300  | 10.62950300 |
| H | -1.59803300 | 9.35727300  | 7.16200700  |
| H | -0.54988200 | 9.84167700  | 9.61900900  |
| C | 8.14997200  | 8.91510700  | 8.31508600  |
| C | 8.63236300  | 9.70831700  | 9.38463100  |
| C | 9.02483400  | 7.98646900  | 7.70005600  |
| C | 9.95499400  | 9.57026100  | 9.82734100  |
| H | 7.97906600  | 10.46111600 | 9.83871300  |
| C | 10.33994800 | 7.83891100  | 8.16130000  |
| H | 8.65859800  | 7.36150500  | 6.87820100  |
| C | 10.80863700 | 8.63116000  | 9.22328900  |
| H | 10.32269000 | 10.20385600 | 10.64106700 |
| H | 11.00041000 | 7.10313400  | 7.69092700  |
| H | 11.83920000 | 8.52098000  | 9.57612300  |
| C | -0.97511300 | 8.46932100  | 4.68323800  |
| C | -1.50676000 | 9.38563400  | 3.74718400  |
| C | -1.80883700 | 7.39292300  | 5.08789300  |

|   |             |             |             |
|---|-------------|-------------|-------------|
| C | -2.79601700 | 9.23109500  | 3.21757000  |
| H | -0.89128900 | 10.23896700 | 3.44553600  |
| C | -3.11278300 | 7.24531800  | 4.57633800  |
| C | -3.60051100 | 8.15659100  | 3.62887600  |
| H | -3.17797100 | 9.96051600  | 2.49661500  |
| H | -3.75248100 | 6.43523900  | 4.94264400  |
| H | -4.61596300 | 8.04037400  | 3.23785600  |
| C | 1.73263200  | 9.60815600  | 11.08532200 |
| C | 0.74418900  | 8.76142400  | 11.64065500 |
| C | 2.22580000  | 10.68493500 | 11.86115100 |
| C | 0.26175500  | 8.98720700  | 12.93742100 |
| H | 0.38059100  | 7.90445200  | 11.06264700 |
| C | 1.72674100  | 10.91724100 | 13.15041400 |
| H | 2.98114200  | 11.35458500 | 11.43604900 |
| C | 0.74685800  | 10.06861000 | 13.69254800 |
| H | -0.48931700 | 8.31375000  | 13.36346300 |
| H | 2.10311600  | 11.76490200 | 13.73223800 |
| H | 0.36436800  | 10.24717700 | 14.70270500 |
| C | 5.31657600  | 9.93914200  | 1.99922400  |
| C | 6.43616300  | 9.25221100  | 1.47124300  |
| C | 4.67714400  | 10.92260600 | 1.20610500  |
| C | 6.90215700  | 9.54382900  | 0.18169100  |
| H | 6.91982600  | 8.46849400  | 2.06435900  |
| C | 5.16003900  | 11.22302100 | -0.07509100 |
| H | 3.82253700  | 11.47380700 | 1.61361500  |
| C | 6.27022700  | 10.53292600 | -0.59122400 |
| H | 7.75895500  | 8.99452200  | -0.22209200 |
| H | 4.67172900  | 12.00200500 | -0.66974900 |
| H | 6.64204000  | 10.76509100 | -1.59450700 |
| N | -1.33418300 | 6.46066800  | 6.08001900  |
| H | -0.86964800 | 6.87049100  | 6.89879100  |
| C | -1.33123100 | 5.11544800  | 5.96281900  |

|   |             |            |            |
|---|-------------|------------|------------|
| N | -1.07047600 | 4.36008700 | 7.05215400 |
| N | -1.54369000 | 4.52374900 | 4.77316200 |
| H | -0.89222400 | 3.36016700 | 6.97188900 |
| H | -1.81627300 | 3.54416200 | 4.70749900 |
| H | -1.65247500 | 5.10057800 | 3.93848400 |
| H | -1.17966400 | 4.73918500 | 7.99103700 |
| N | 3.69780500  | 7.23468600 | 6.50889900 |
| O | 3.77950600  | 6.06444100 | 6.49277400 |

11.2.  $\{Fe(TPP)NO\}^6$  complex:

Charge: +1, spin multiplicity: 1

|    |            |             |            |
|----|------------|-------------|------------|
| Fe | 4.05411800 | 12.93826700 | 3.29770800 |
| N  | 3.49363700 | 14.83103800 | 3.40162500 |
| N  | 2.44698900 | 12.56478800 | 2.21100500 |
| N  | 4.18684100 | 10.98505500 | 3.63050700 |
| N  | 5.15491800 | 13.25468300 | 4.91536100 |
| N  | 5.17191000 | 13.06953600 | 2.14961600 |
| C  | 1.38348400 | 14.81493800 | 2.08146400 |
| C  | 2.88243400 | 10.16494200 | 1.68454500 |
| C  | 5.64519000 | 10.92299400 | 5.64933000 |
| C  | 5.38012700 | 15.72894800 | 4.74794100 |
| C  | 4.29974600 | 15.87648200 | 3.86599800 |
| C  | 2.43421500 | 15.46302700 | 2.75256900 |
| C  | 1.42630800 | 13.43820300 | 1.81536900 |
| C  | 2.16179700 | 11.36669700 | 1.55422800 |
| C  | 3.83392500 | 9.99718100  | 2.70173000 |
| C  | 4.99476500 | 10.32661200 | 4.55519400 |
| C  | 5.73536800 | 12.31694400 | 5.77789900 |
| C  | 5.69965300 | 14.48052600 | 5.30864400 |
| C  | 3.74624900 | 17.15161000 | 3.48804600 |
| H  | 4.18168700 | 18.11599400 | 3.74450100 |
| C  | 2.57897800 | 16.89565600 | 2.81938800 |

|   |             |             |             |
|---|-------------|-------------|-------------|
| H | 1.87164200  | 17.60725800 | 2.39657600  |
| C | 0.45766800  | 12.74404800 | 1.00626700  |
| H | -0.46682000 | 13.18253000 | 0.63499600  |
| C | 0.93373800  | 11.47505400 | 0.81031700  |
| H | 0.47381500  | 10.65927400 | 0.25507300  |
| C | 4.46551400  | 8.74495600  | 3.02910400  |
| H | 4.37675900  | 7.83106100  | 2.44430600  |
| C | 5.14935600  | 8.93863300  | 4.20014000  |
| H | 5.73910800  | 8.21894400  | 4.76561300  |
| C | 6.55658200  | 12.97793000 | 6.76008900  |
| H | 7.06953700  | 12.47577700 | 7.57821600  |
| C | 6.58244700  | 14.30701400 | 6.43246500  |
| H | 7.12399300  | 15.11244200 | 6.92551900  |
| C | 0.24195800  | 15.63535200 | 1.57691500  |
| C | -0.02127100 | 15.75176900 | 0.19279000  |
| H | 0.63156800  | 15.24442800 | -0.52594000 |
| C | -1.09176300 | 16.53595500 | -0.26176900 |
| H | -1.27715000 | 16.62831000 | -1.33722400 |
| C | -1.91758800 | 17.20512500 | 0.65682400  |
| H | -2.75565300 | 17.81293400 | 0.29982700  |
| C | -1.66345700 | 17.09569700 | 2.03411200  |
| H | -2.30632600 | 17.61158700 | 2.75521800  |
| C | -0.58650400 | 16.32332600 | 2.49322200  |
| H | -0.39342900 | 16.23239700 | 3.56778600  |
| C | 2.54428600  | 9.03185300  | 0.77410700  |
| C | 2.71956100  | 9.17902100  | -0.62147300 |
| H | 3.12101800  | 10.11807400 | -1.01805500 |
| C | 2.40734800  | 8.12457700  | -1.49171500 |
| H | 2.56271300  | 8.24674300  | -2.56891200 |
| C | 1.89901000  | 6.91739400  | -0.98406300 |
| H | 1.65018000  | 6.09684300  | -1.66523300 |
| C | 1.70486900  | 6.76745600  | 0.39928100  |

|   |            |             |            |
|---|------------|-------------|------------|
| H | 1.29322500 | 5.83464800  | 0.79912100 |
| C | 2.02860900 | 7.81402700  | 1.27506000 |
| H | 1.85515200 | 7.70258500  | 2.35090500 |
| C | 6.32829000 | 10.03573600 | 6.63861200 |
| C | 7.73279200 | 10.05642800 | 6.79826600 |
| H | 8.33793100 | 10.72537700 | 6.17656200 |
| C | 8.35348300 | 9.20440300  | 7.72372500 |
| H | 9.44350400 | 9.22123400  | 7.82892900 |
| C | 7.58223800 | 8.32886500  | 8.50622100 |
| H | 8.06869300 | 7.66815300  | 9.23151900 |
| C | 6.18621000 | 8.29971400  | 8.35266700 |
| H | 5.57941300 | 7.62143400  | 8.96191100 |
| C | 5.56184300 | 9.14031300  | 7.41941800 |
| H | 4.47251200 | 9.12151900  | 7.30430900 |
| C | 6.13675900 | 16.95059200 | 5.16402000 |
| C | 6.95534000 | 17.61953000 | 4.22691500 |
| H | 7.04255400 | 17.22659700 | 3.20785300 |
| C | 7.66714500 | 18.76939000 | 4.60109300 |
| H | 8.30700900 | 19.27255500 | 3.86836200 |
| C | 7.56061900 | 19.27157800 | 5.90839300 |
| H | 8.11395300 | 20.17116600 | 6.19779300 |
| C | 6.73843900 | 18.61976800 | 6.84249100 |
| H | 6.64078200 | 19.01427800 | 7.85953100 |
| C | 6.03132800 | 17.46460600 | 6.47598200 |
| H | 5.37588600 | 16.96871000 | 7.20055400 |
| O | 5.97571500 | 13.18084400 | 1.30396300 |

### 11.3. [Fe<sup>III</sup>MARGH] -NO<sub>2</sub><sup>-</sup>:

Charge: +1, spin multiplicity: 6

|    |            |            |            |
|----|------------|------------|------------|
| Fe | 3.35895700 | 8.96759300 | 6.68345900 |
| N  | 5.20319700 | 9.23804900 | 5.83198800 |
| N  | 2.54254600 | 9.20129500 | 4.81743200 |



|   |             |             |             |
|---|-------------|-------------|-------------|
| N | 1.52673300  | 9.39671200  | 7.49995900  |
| N | 4.19902300  | 9.35765400  | 8.50448900  |
| C | 6.58392100  | 8.95482200  | 7.89344800  |
| C | 4.58442000  | 9.52496600  | 3.42848200  |
| C | 3.19031700  | 9.38194300  | 3.59606800  |
| C | 1.19680700  | 9.03529700  | 4.51928100  |
| C | 6.94969500  | 9.38151000  | 4.31081000  |
| C | 7.50594900  | 9.15764300  | 5.54754600  |
| C | 6.41691600  | 9.07835900  | 6.49282500  |
| C | 5.51659500  | 9.42191100  | 4.49047800  |
| C | 0.99642100  | 9.08476300  | 3.09026900  |
| C | 2.22278800  | 9.34435600  | 2.52306300  |
| C | 2.15535900  | 9.81031400  | 9.87376600  |
| C | 3.54483400  | 9.58162100  | 9.71126500  |
| C | 1.21789600  | 9.69634000  | 8.82437100  |
| C | 0.15796400  | 8.95308700  | 5.47271500  |
| C | 4.47557500  | 9.44218000  | 10.80604400 |
| C | 5.53293500  | 9.11340300  | 8.82803300  |
| C | 5.69831400  | 9.12390700  | 10.26141600 |
| C | -0.77838200 | 9.41461600  | 7.78149400  |
| C | -0.21800300 | 9.75764800  | 8.98844000  |
| C | 0.31208300  | 9.21991900  | 6.85257200  |
| H | 7.46416900  | 9.49197200  | 3.35728500  |
| H | 8.56194100  | 9.07299700  | 5.79973300  |
| H | 0.03248800  | 9.00197300  | 2.58749200  |
| H | 2.45214500  | 9.49823000  | 1.46929100  |
| H | 4.21939600  | 9.53800400  | 11.86027300 |
| H | 6.62862100  | 8.91560900  | 10.78789700 |
| H | -1.83764800 | 9.34141000  | 7.53573100  |
| H | -0.73228100 | 10.01430300 | 9.91356400  |
| C | 7.96675600  | 8.70516900  | 8.40752500  |
| C | 8.63580200  | 9.66178900  | 9.20452400  |

|   |             |             |             |
|---|-------------|-------------|-------------|
| C | 8.63019000  | 7.49853000  | 8.08741700  |
| C | 9.93514700  | 9.41431800  | 9.67242600  |
| H | 8.13955800  | 10.61056400 | 9.43681200  |
| C | 9.92630900  | 7.25147900  | 8.56406500  |
| H | 8.11455600  | 6.74857800  | 7.47746200  |
| C | 10.58210900 | 8.20811100  | 9.35652600  |
| H | 10.44532400 | 10.16956800 | 10.28007200 |
| H | 10.42342800 | 6.30694700  | 8.31772600  |
| H | 11.59539200 | 8.01540600  | 9.72490300  |
| C | -1.19463300 | 8.50783200  | 4.99822600  |
| C | -2.22851100 | 9.40489800  | 4.67378800  |
| C | -1.45709200 | 7.11189500  | 4.91185400  |
| C | -3.49261200 | 8.94283700  | 4.27015700  |
| H | -2.02786400 | 10.47964000 | 4.73755000  |
| C | -2.73920200 | 6.64568500  | 4.55700300  |
| C | -3.74732200 | 7.56464000  | 4.22230200  |
| H | -4.27963700 | 9.65884500  | 4.01330800  |
| H | -2.97093400 | 5.57633400  | 4.60363300  |
| H | -4.74054800 | 7.19485100  | 3.94783500  |
| C | 1.65988200  | 10.11822400 | 11.25272000 |
| C | 0.80984900  | 9.22438200  | 11.94270300 |
| C | 2.05294600  | 11.31595700 | 11.89213700 |
| C | 0.36026300  | 9.52535600  | 13.23738700 |
| H | 0.52098200  | 8.28103600  | 11.46605900 |
| C | 1.59612300  | 11.61691600 | 13.18414400 |
| H | 2.70673300  | 12.01774800 | 11.36251800 |
| C | 0.74928600  | 10.72296800 | 13.85990700 |
| H | -0.28990200 | 8.81796600  | 13.76363300 |
| H | 1.90097000  | 12.55417400 | 13.66217800 |
| H | 0.39605000  | 10.95733500 | 14.86979100 |
| C | 5.12014500  | 9.74436000  | 2.04682500  |
| C | 5.00655000  | 8.74748700  | 1.05207800  |

|   |             |             |             |
|---|-------------|-------------|-------------|
| C | 5.75882100  | 10.96217700 | 1.72123500  |
| C | 5.51599100  | 8.96554500  | -0.23722700 |
| H | 4.53375700  | 7.79108800  | 1.30219600  |
| C | 6.26249400  | 11.17939600 | 0.42970300  |
| H | 5.84554800  | 11.74383200 | 2.48406700  |
| C | 6.14278200  | 10.18236000 | -0.55237600 |
| H | 5.42960900  | 8.17931300  | -0.99526400 |
| H | 6.74703900  | 12.13216300 | 0.19027200  |
| H | 6.53915700  | 10.35198700 | -1.55918100 |
| N | -0.39921700 | 6.22147700  | 5.27033600  |
| H | 0.31136700  | 6.59230900  | 5.92969300  |
| C | -0.03267800 | 5.07225100  | 4.65396700  |
| N | 1.03816900  | 4.41299700  | 5.12559700  |
| N | -0.75461600 | 4.57260700  | 3.61918800  |
| H | 1.38717100  | 3.58214400  | 4.65338000  |
| H | -0.37023600 | 3.81116200  | 3.06357800  |
| H | -1.42322500 | 5.18783500  | 3.15407300  |
| H | 1.63121400  | 4.88214100  | 5.85300900  |
| N | 3.14953800  | 6.84834300  | 6.63779000  |
| O | 4.10729900  | 6.13065200  | 6.34103700  |
| O | 1.98760400  | 6.32855300  | 6.80439700  |

#### 11.4. Fe<sup>III</sup>TPP-NO<sub>2</sub><sup>-</sup>:

Charge: 0, spin multiplicity: 6

|    |            |             |            |
|----|------------|-------------|------------|
| Fe | 4.05012700 | 12.94144100 | 3.27015200 |
| N  | 3.43342100 | 14.90390700 | 3.41018700 |
| N  | 2.38466900 | 12.58251900 | 2.10302500 |
| N  | 4.15813800 | 10.91318600 | 3.65341500 |
| N  | 5.23829900 | 13.24560300 | 4.93401600 |
| C  | 1.44361200 | 14.88177300 | 1.90861600 |
| C  | 2.67561700 | 10.12052200 | 1.81311400 |
| C  | 5.81548200 | 10.89414300 | 5.51968000 |

|   |             |             |             |
|---|-------------|-------------|-------------|
| C | 5.23637300  | 15.73768800 | 4.91818800  |
| C | 4.16344700  | 15.91806300 | 4.01688100  |
| C | 2.40740800  | 15.53009700 | 2.71451000  |
| C | 1.44701500  | 13.49439400 | 1.63536100  |
| C | 2.04320800  | 11.35747600 | 1.54681000  |
| C | 3.66104400  | 9.92803000  | 2.80806400  |
| C | 5.02758300  | 10.26997500 | 4.52454000  |
| C | 5.91052600  | 12.29404000 | 5.69032600  |
| C | 5.69112000  | 14.48150500 | 5.37770900  |
| C | 3.59470100  | 17.20437300 | 3.67959700  |
| H | 3.97433600  | 18.16583400 | 4.02325400  |
| C | 2.50476200  | 16.96449400 | 2.88016000  |
| H | 1.83317700  | 17.69382000 | 2.42896300  |
| C | 0.48373200  | 12.82003900 | 0.79272800  |
| H | -0.37705300 | 13.29285400 | 0.32153700  |
| C | 0.86450100  | 11.50258000 | 0.72148500  |
| H | 0.37111800  | 10.69189100 | 0.18678600  |
| C | 4.25898200  | 8.65197600  | 3.13384200  |
| H | 4.07458800  | 7.71885500  | 2.60319200  |
| C | 5.08828200  | 8.85942600  | 4.20795700  |
| H | 5.71392000  | 8.12947100  | 4.72010600  |
| C | 6.78028800  | 12.94892000 | 6.64361300  |
| H | 7.40606200  | 12.43942600 | 7.37524200  |
| C | 6.67013800  | 14.30018100 | 6.42645800  |
| H | 7.19361200  | 15.10488600 | 6.94121800  |
| C | 0.37795400  | 15.72519200 | 1.27802500  |
| C | 0.30098900  | 15.86942500 | -0.12572300 |
| H | 1.04156100  | 15.36411700 | -0.75539000 |
| C | -0.69763700 | 16.66363400 | -0.71004500 |
| H | -0.73704800 | 16.76983200 | -1.80007800 |
| C | -1.63676300 | 17.32619700 | 0.09747600  |
| H | -2.41653500 | 17.94566900 | -0.35955000 |

|   |             |             |             |
|---|-------------|-------------|-------------|
| C | -1.56995300 | 17.19167200 | 1.49400700  |
| H | -2.30133200 | 17.70126500 | 2.13155500  |
| C | -0.57053400 | 16.39951900 | 2.07975400  |
| H | -0.52418700 | 16.28761100 | 3.16873100  |
| C | 2.23412300  | 8.93526900  | 1.01101000  |
| C | 2.46125800  | 8.90248800  | -0.38353200 |
| H | 2.97805500  | 9.74391000  | -0.85775100 |
| C | 2.05119700  | 7.79975500  | -1.14837100 |
| H | 2.24388100  | 7.78670400  | -2.22709900 |
| C | 1.40313100  | 6.71512900  | -0.53452500 |
| H | 1.08206800  | 5.85501600  | -1.13274800 |
| C | 1.16770800  | 6.73886000  | 0.85009600  |
| H | 0.65521600  | 5.90050700  | 1.33555100  |
| C | 1.58029400  | 7.83919100  | 1.61738100  |
| H | 1.38458900  | 7.86315000  | 2.69519700  |
| C | 6.63808300  | 10.01148800 | 6.40850500  |
| C | 8.05023500  | 10.04169400 | 6.36276700  |
| H | 8.54715900  | 10.71550700 | 5.65615200  |
| C | 8.81113200  | 9.20691600  | 7.19572400  |
| H | 9.90520700  | 9.23870100  | 7.14110900  |
| C | 8.17480500  | 8.32843300  | 8.08817700  |
| H | 8.76980500  | 7.67742600  | 8.73843600  |
| C | 6.77184500  | 8.28697500  | 8.14050200  |
| H | 6.26690700  | 7.60687300  | 8.83591000  |
| C | 6.00974200  | 9.11959400  | 7.30652800  |
| H | 4.91534300  | 9.09249700  | 7.35266200  |
| C | 5.90891500  | 16.97025200 | 5.44698100  |
| C | 6.73697700  | 17.73765800 | 4.59835000  |
| H | 6.88687900  | 17.41047700 | 3.56362100  |
| C | 7.37113900  | 18.89466100 | 5.07739300  |
| H | 8.01541200  | 19.47605900 | 4.40815400  |
| C | 7.18609700  | 19.30276300 | 6.40870200  |

|   |            |             |            |
|---|------------|-------------|------------|
| H | 7.68139200 | 20.20633500 | 6.78156600 |
| C | 6.36244900 | 18.54774400 | 7.25983500 |
| H | 6.20789200 | 18.86291400 | 8.29809400 |
| C | 5.72766400 | 17.38989600 | 6.78291300 |
| H | 5.07648100 | 16.80653000 | 7.44363900 |
| N | 5.49950500 | 13.13027200 | 1.77255400 |
| O | 5.49282400 | 12.27677800 | 0.86303100 |
| O | 6.30306300 | 14.08099100 | 1.83449600 |

### 11.5. NO:

Charge: 0, spin multiplicity: 2

|   |             |             |            |
|---|-------------|-------------|------------|
| O | 0.51046600  | -2.22996500 | 0.00000000 |
| N | -0.66197000 | -2.22996500 | 0.00000000 |

### 11.6. NO<sub>2</sub><sup>-</sup>:

Charge: -1, spin multiplicity: 1

|   |             |             |            |
|---|-------------|-------------|------------|
| N | 0.49933400  | -2.27034600 | 0.00000000 |
| O | -0.10068500 | -1.12863400 | 0.00000000 |
| O | 1.78809400  | -2.21912100 | 0.00000000 |

### 11.7. [Fe<sup>III</sup>MARGH]-Cl :

|    |            |            |            |
|----|------------|------------|------------|
| Fe | 3.34057900 | 9.16893900 | 6.65837400 |
| N  | 5.19062200 | 9.14354500 | 5.79836700 |
| N  | 2.49069700 | 9.31674900 | 4.78402600 |
| N  | 1.49410100 | 9.67687500 | 7.49165200 |
| N  | 4.20887000 | 9.39334100 | 8.51044700 |
| C  | 6.56299600 | 8.89902800 | 7.86419000 |
| C  | 4.54879400 | 9.41901700 | 3.39994500 |
| C  | 3.14535700 | 9.41831500 | 3.57029600 |
| C  | 1.14389900 | 9.21853100 | 4.51366600 |
| C  | 6.91137700 | 9.09708200 | 4.25813000 |

|   |             |             |             |
|---|-------------|-------------|-------------|
| C | 7.46685900  | 8.88867500  | 5.49564900  |
| C | 6.39106800  | 8.93510200  | 6.45958200  |
| C | 5.48714300  | 9.25630600  | 4.44729700  |
| C | 0.93360800  | 9.25523500  | 3.08300400  |
| C | 2.16795500  | 9.41966400  | 2.50200000  |
| C | 2.18807400  | 9.93153900  | 9.87458900  |
| C | 3.57552300  | 9.69905300  | 9.70517500  |
| C | 1.22431600  | 9.84853000  | 8.84064300  |
| C | 0.12127800  | 9.15799500  | 5.49017100  |
| C | 4.54370600  | 9.66827500  | 10.77954200 |
| C | 5.54146800  | 9.15882900  | 8.80857700  |
| C | 5.74671900  | 9.30041600  | 10.23245900 |
| C | -0.77818000 | 9.44032700  | 7.85279900  |
| C | -0.20176500 | 9.73956100  | 9.06131300  |
| C | 0.28492800  | 9.41156900  | 6.87180700  |
| H | 7.42448800  | 9.12971800  | 3.29913500  |
| H | 8.51740200  | 8.73675300  | 5.73473700  |
| H | -0.03540300 | 9.22862900  | 2.58573100  |
| H | 2.39455100  | 9.53030300  | 1.44327800  |
| H | 4.33193500  | 9.88943300  | 11.82345200 |
| H | 6.69183100  | 9.15102300  | 10.75022200 |
| H | -1.83319700 | 9.25990300  | 7.65267800  |
| H | -0.69547800 | 9.83245800  | 10.02640100 |
| C | 7.94553100  | 8.63437400  | 8.37679300  |
| C | 8.70364200  | 9.65417300  | 8.98557500  |
| C | 8.51163500  | 7.35078800  | 8.24524000  |
| C | 9.99760500  | 9.39476700  | 9.45394400  |
| H | 8.27965600  | 10.65902000 | 9.07760800  |
| C | 9.80291200  | 7.09220100  | 8.72159000  |
| H | 7.92626200  | 6.55108700  | 7.78140100  |
| C | 10.54897400 | 8.11284000  | 9.32582300  |
| H | 10.57794800 | 10.19839700 | 9.91700300  |

|   |             |             |             |
|---|-------------|-------------|-------------|
| H | 10.22589000 | 6.08807700  | 8.62238500  |
| H | 11.55871400 | 7.91033100  | 9.69457200  |
| C | -1.21592300 | 8.64951000  | 5.04514700  |
| C | -2.32719300 | 9.47409000  | 4.81045900  |
| C | -1.37878400 | 7.24787200  | 4.90655800  |
| C | -3.56557100 | 8.93157100  | 4.43852400  |
| H | -2.20937200 | 10.55632500 | 4.91569400  |
| C | -2.63087700 | 6.69699100  | 4.58700900  |
| C | -3.71892600 | 7.54452000  | 4.33550300  |
| H | -4.41529300 | 9.59313800  | 4.24978300  |
| H | -2.77452500 | 5.61207900  | 4.60146800  |
| H | -4.69218300 | 7.11309800  | 4.08665700  |
| C | 1.67920900  | 10.18710400 | 11.25895800 |
| C | 1.76002700  | 9.19407000  | 12.25660500 |
| C | 1.08845700  | 11.42574300 | 11.58056200 |
| C | 1.26534900  | 9.43746600  | 13.54356400 |
| H | 2.19410600  | 8.22012000  | 12.01102700 |
| C | 0.60299100  | 11.67021600 | 12.87111700 |
| H | 1.02467400  | 12.20609300 | 10.81567500 |
| C | 0.68921000  | 10.67658600 | 13.85532000 |
| H | 1.32595100  | 8.65345400  | 14.30426800 |
| H | 0.15818300  | 12.64122300 | 13.10841100 |
| H | 0.30677800  | 10.86654000 | 14.86240300 |
| C | 5.08692200  | 9.54477500  | 2.00692800  |
| C | 4.93870300  | 8.50119500  | 1.07237300  |
| C | 5.76155000  | 10.71738200 | 1.61325300  |
| C | 5.45275100  | 8.62741500  | -0.22436400 |
| H | 4.43316200  | 7.57872400  | 1.37484300  |
| C | 6.26906000  | 10.84474200 | 0.31418700  |
| H | 5.87577400  | 11.53684800 | 2.32938200  |
| C | 6.11699700  | 9.80027400  | -0.60733500 |
| H | 5.33961100  | 7.80417800  | -0.93633300 |



|    |             |             |             |
|----|-------------|-------------|-------------|
| H  | 6.78359100  | 11.76471600 | 0.02120600  |
| H  | 6.51705100  | 9.89908400  | -1.62060900 |
| N  | -0.24778900 | 6.40729000  | 5.17568900  |
| H  | 0.38880600  | 6.71949100  | 5.92308400  |
| C  | 0.27471400  | 5.47892000  | 4.34472200  |
| N  | 1.47981800  | 4.96893100  | 4.62734800  |
| N  | -0.41728500 | 5.04064600  | 3.26794900  |
| H  | 1.84642000  | 4.16779000  | 4.12461000  |
| H  | 0.07892300  | 4.56315000  | 2.52196900  |
| H  | -1.26891200 | 5.53140500  | 3.00276600  |
| H  | 2.07349500  | 5.41505500  | 5.35007700  |
| O  | 3.44884900  | 11.46500700 | 6.49060700  |
| H  | 2.57444800  | 11.73559300 | 6.82781000  |
| C  | 4.47341000  | 12.31514500 | 7.04570400  |
| H  | 4.32101800  | 13.35618900 | 6.71757200  |
| H  | 4.49495500  | 12.26456900 | 8.14659100  |
| H  | 5.42636800  | 11.94832200 | 6.64682500  |
| Cl | 2.83371700  | 6.81624500  | 6.83175600  |

**11.8.  $Fe^{III}TPP-Cl$  :**

|    |            |             |            |
|----|------------|-------------|------------|
| Fe | 4.03865500 | 12.93780000 | 3.29728400 |
| N  | 3.43938900 | 14.93523000 | 3.41960800 |
| N  | 2.33659200 | 12.56874800 | 2.12345800 |
| N  | 4.18382500 | 10.88834100 | 3.60880400 |
| N  | 5.26385500 | 13.25641500 | 4.93466800 |
| C  | 1.55490200 | 14.91114300 | 1.79129200 |
| C  | 2.54514800 | 10.09441300 | 1.91452300 |
| C  | 5.95531200 | 10.90119100 | 5.35658800 |
| C  | 5.14954000 | 15.74023600 | 5.04142900 |
| C  | 4.10023800 | 15.93253700 | 4.11410200 |
| C  | 2.45891100 | 15.55510300 | 2.66535800 |
| C  | 1.50627400 | 13.52014600 | 1.55083800 |
| C  | 1.96496000 | 11.34291500 | 1.59491200 |
| C  | 3.57535000 | 9.89865700  | 2.86125900 |
| C  | 5.10060200 | 10.26267800 | 4.43202500 |
| C  | 6.02409900 | 12.29463900 | 5.57603300 |
| C  | 5.67206400 | 14.48445300 | 5.42415900 |
| C  | 3.51722500 | 17.21708100 | 3.78633700 |

|   |             |             |             |
|---|-------------|-------------|-------------|
| H | 3.83478500  | 18.17373700 | 4.19638800  |
| C | 2.50880800  | 16.98486800 | 2.88887100  |
| H | 1.85707000  | 17.71718800 | 2.41639900  |
| C | 0.57014300  | 12.86855800 | 0.66108900  |
| H | -0.21200600 | 13.37184000 | 0.09594700  |
| C | 0.85502000  | 11.52794300 | 0.68548200  |
| H | 0.34675000  | 10.73077700 | 0.14654200  |
| C | 4.14920200  | 8.61255800  | 3.20342500  |
| H | 3.87759600  | 7.66233400  | 2.74800700  |
| C | 5.08487200  | 8.83653500  | 4.17739200  |
| H | 5.72255900  | 8.10439200  | 4.66891700  |
| C | 6.92848900  | 12.93761200 | 6.50571900  |
| H | 7.63728900  | 12.42172600 | 7.15055700  |
| C | 6.72332100  | 14.28809100 | 6.40026800  |
| H | 7.24093300  | 15.08260700 | 6.93410800  |
| C | 0.58137600  | 15.77372900 | 1.04234900  |
| C | 0.76093100  | 16.02143300 | -0.33259400 |
| H | 1.62369000  | 15.58471100 | -0.84474100 |
| C | -0.14357700 | 16.82704400 | -1.03620000 |
| H | 0.01409700  | 17.01429200 | -2.10303200 |
| C | -1.24232500 | 17.39527700 | -0.37756300 |
| H | -1.94903200 | 18.02380100 | -0.92822400 |
| C | -1.43063900 | 17.15541000 | 0.99007300  |
| H | -2.28768200 | 17.59286900 | 1.51188800  |
| C | -0.52446600 | 16.35202400 | 1.69471100  |
| H | -0.67535500 | 16.16205500 | 2.76208700  |
| C | 2.01796400  | 8.88682200  | 1.19911800  |
| C | 2.28465600  | 8.69704700  | -0.17128400 |
| H | 2.89127800  | 9.43590000  | -0.70364900 |
| C | 1.79637900  | 7.56929700  | -0.84343700 |
| H | 2.01961700  | 7.43359600  | -1.90636000 |
| C | 1.03121100  | 6.61596000  | -0.15820600 |
| H | 0.64933400  | 5.73560500  | -0.68440300 |
| C | 0.75851800  | 6.79545700  | 1.20457200  |
| H | 0.15823100  | 6.05781400  | 1.74654800  |
| C | 1.24931900  | 7.92120400  | 1.87840900  |
| H | 1.03000900  | 8.06409700  | 2.94110600  |
| C | 6.87949100  | 10.03064400 | 6.15714900  |
| C | 8.25344100  | 9.97357100  | 5.85326800  |
| H | 8.64026000  | 10.56541400 | 5.01812900  |
| C | 9.11542400  | 9.16092500  | 6.60107400  |
| H | 10.17975200 | 9.12330600  | 6.34837300  |
| C | 8.61758900  | 8.39617100  | 7.66468800  |
| H | 9.29173400  | 7.76248000  | 8.24930000  |
| C | 7.25190600  | 8.44542200  | 7.97468600  |
| H | 6.85543200  | 7.85277100  | 8.80524800  |
| C | 6.38860100  | 9.25515300  | 7.22509300  |
| H | 5.32269400  | 9.29747400  | 7.46988300  |
| C | 5.74876800  | 16.96370500 | 5.66813700  |
| C | 6.54060000  | 17.84072500 | 4.90078200  |

|    |            |             |            |
|----|------------|-------------|------------|
| H  | 6.72215400 | 17.61045400 | 3.84664100 |
| C  | 7.10312800 | 18.98560800 | 5.47948100 |
| H  | 7.72137200 | 19.65236600 | 4.87020400 |
| C  | 6.88108000 | 19.27367700 | 6.83283500 |
| H  | 7.32034400 | 20.16866500 | 7.28426800 |
| C  | 6.09366000 | 18.40942500 | 7.60517800 |
| H  | 5.91088400 | 18.62943200 | 8.66179400 |
| C  | 5.53281000 | 17.26302400 | 7.02758300 |
| H  | 4.91091000 | 16.59356300 | 7.62997200 |
| O  | 2.26847800 | 12.65557900 | 4.97390200 |
| H  | 1.52326600 | 12.62253900 | 4.34523200 |
| C  | 1.96262300 | 13.57490800 | 6.03246300 |
| H  | 1.08814800 | 13.23129800 | 6.61359500 |
| H  | 2.84092100 | 13.59026900 | 6.69004800 |
| H  | 1.78088100 | 14.59663000 | 5.65599300 |
| Cl | 5.56241900 | 13.15149500 | 1.64199700 |

## References

1. Bhakta, S.; Nayek, A.; Roy, B.; Dey, A., Induction of Enzyme-like Peroxidase Activity in an Iron Porphyrin Complex Using Second Sphere Interactions. *Inorganic Chemistry* **2019**, *58*.
2. Adler, A. D.; Longo, F. R.; Kampas, F.; Kim, J., On the preparation of metalloporphyrins. *Journal of Inorganic and Nuclear Chemistry* **1970**, *32* (7), 2443-2445.
3. Adler, A. D.; Longo, F. R.; Finarelli, J. D.; Goldmacher, J.; Assour, J.; Korsakoff, L., A simplified synthesis for meso-tetraphenylporphine. *The Journal of Organic Chemistry* **1967**, *32* (2), 476-476.
